# Supplementary material for: Pathogenesis of COVID-19-induced ARDS: implications for an ageing population
Source: PubMed Central journal article supplement — Eur Respir J. 2020 Sep 24;56(3):2002049. doi: 10.1183/13993003.02049-2020 (PMC7397945; doi:10.1183/13993003.02049-2020), 2020-09-24
Supplement: ERJ-02049-2020.Shareable.pdf [file ERJ-02049-2020.Shareable.pdf]

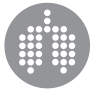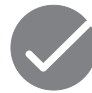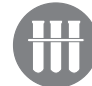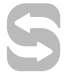

SHAREABLE PDF

# Pathogenesis of COVID-19-induced ARDS: implications for an ageing population

Manuel A. Torres Acosta <sup>1</sup> and Benjamin D. Singer <sup>1,2,3</sup>

**Affiliations:** <sup>1</sup>Division of Pulmonary and Critical Care Medicine, Dept of Medicine, Northwestern University Feinberg School of Medicine, Chicago, IL, USA. <sup>2</sup>Dept of Biochemistry and Molecular Genetics, Northwestern University Feinberg School of Medicine, Chicago, IL, USA. <sup>3</sup>Simpson Querrey Center for Epigenetics, Northwestern University Feinberg School of Medicine, Chicago, IL, USA.

**Correspondence:** Benjamin D. Singer, Division of Pulmonary and Critical Care Medicine, Dept of Medicine, Dept of Biochemistry and Molecular Genetics, Simpson Querrey Center for Epigenetics, Northwestern University Feinberg School of Medicine, Simpson Querrey, 5th Floor, Chicago, IL 60611, USA. E-mail: benjamin-singer@northwestern.edu

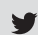

@ERSpublications

**Review of viral ARDS pathogenesis, how it informs evolving models of COVID-19, and how hallmarks of ageing explain the age-related morbidity and mortality of severe COVID-19** <https://bit.ly/39Ca0c0>

**Cite this article as:** Torres Acosta MA, Singer BD. Pathogenesis of COVID-19-induced ARDS: implications for an ageing population. *Eur Respir J* 2020; 56: 2002049 [<https://doi.org/10.1183/13993003.02049-2020>].

This single-page version can be shared freely online.

**ABSTRACT** The coronavirus disease 2019 (COVID-19) pandemic has elicited a swift response by the scientific community to elucidate the pathogenesis of severe acute respiratory syndrome-coronavirus-2 (SARS-CoV-2)-induced lung injury and develop effective therapeutics. Clinical data indicate that severe COVID-19 most commonly manifests as viral pneumonia-induced acute respiratory distress syndrome (ARDS), a clinical entity mechanistically understood best in the context of influenza A virus-induced pneumonia. Similar to influenza, advanced age has emerged as the leading host risk factor for developing severe COVID-19. In this review we connect the current understanding of the SARS-CoV-2 replication cycle and host response to the clinical presentation of COVID-19, borrowing concepts from influenza A virus-induced ARDS pathogenesis and discussing how these ideas inform our evolving understanding of COVID-19-induced ARDS. We also consider important differences between COVID-19 and influenza, mainly the protean clinical presentation and associated lymphopenia of COVID-19, the contrasting role of interferon- $\gamma$  in mediating the host immune response to these viruses, and the tropism for vascular endothelial cells of SARS-CoV-2, commenting on the potential limitations of influenza as a model for COVID-19. Finally, we explore hallmarks of ageing that could explain the association between advanced age and susceptibility to severe COVID-19.
